# Supplementary material for: Associations among unit leadership and unit climates for implementation in acute care: a cross-sectional study
Source: Springer Nature journal article supplement (doi:10.1186/s13012-018-0753-6), 2018-04-25
Supplement: MOESM1 [file 15718380]

# Associations among unit leadership and unit climates for implementation in acute care: a cross-sectional study

Clayton J. Shuman, PhD, RN ([clayshu@umich.edu](mailto:clayshu@umich.edu)) et al.

## Supplementary Material: Data Collection Timeline

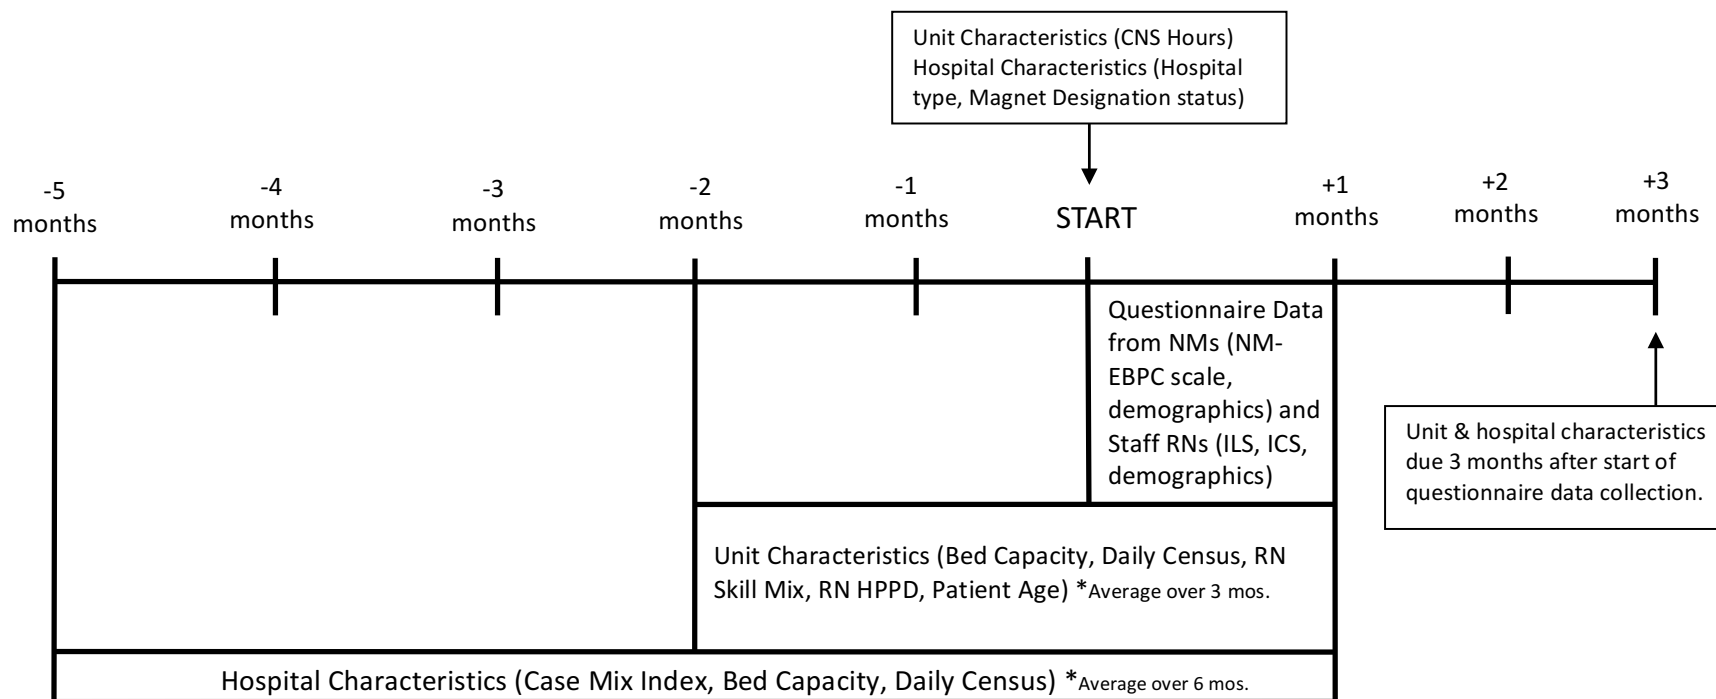

Note: CNS= clinical nurse specialist; NM= nurse manager; RN= registered nurse; NM-EBPC= *Nurse Manager EBP Competency Scale*; ILS= *Implementation Leadership Scale*; ICS= *Implementation Climate Scale*; HPPD= hours per patient day.
